# Supplementary material for: A biomimetic solution, albumin–doxorubicin molecular complex, targeting tumor and tumor-draining lymph nodes
Source: Royal Society of Chemistry journal article supplement (doi:10.1039/d4tb01917b), 2024-01-01
Supplement: d4tb01917b1.pdf [file d4tb01917b1.pdf]

### Supporting Information

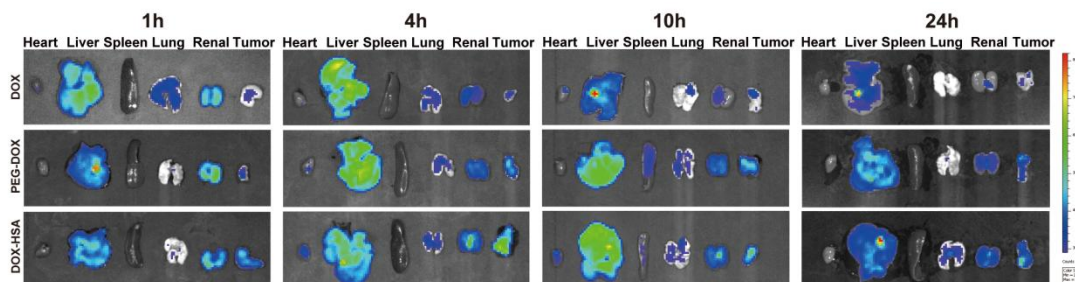

**Figure S1.** Images of fluorescence distributed in heart, liver, spleen, lung, kidney and tumor tissues at 1 h, 4 h, 10 h and 24 h of DOX, PEG-DOX and DOX-HSA. (n = 3).

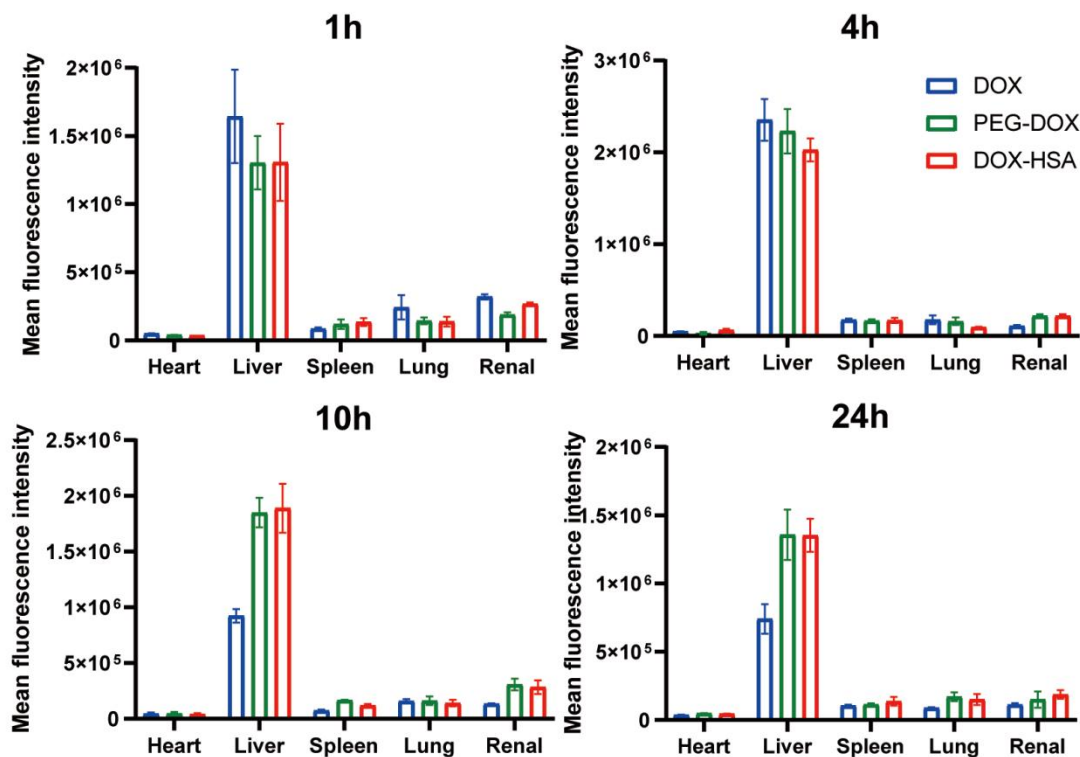

**Figure S2.** Semi-quantitative results of fluorescence intensity of heart, liver, spleen, lung and renal tissues at 1 h, 4 h, 10 h and 24 h. (n = 3).

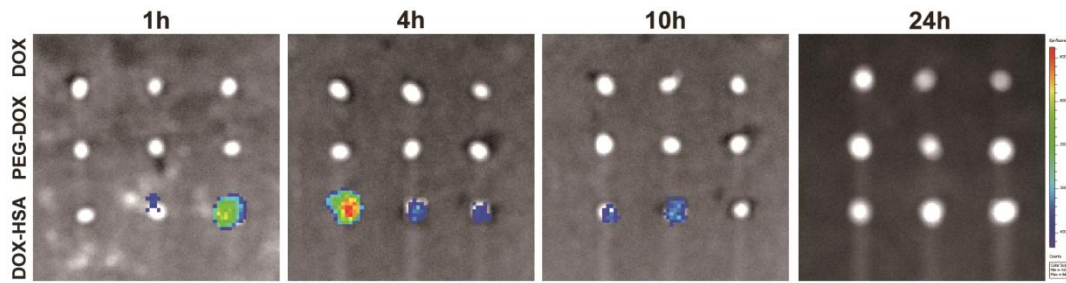

**Figure S3.** Images of fluorescence distributed in axillary lymph nodes of DOX, PEG-DOX, and DOX-HSA. (n=3).

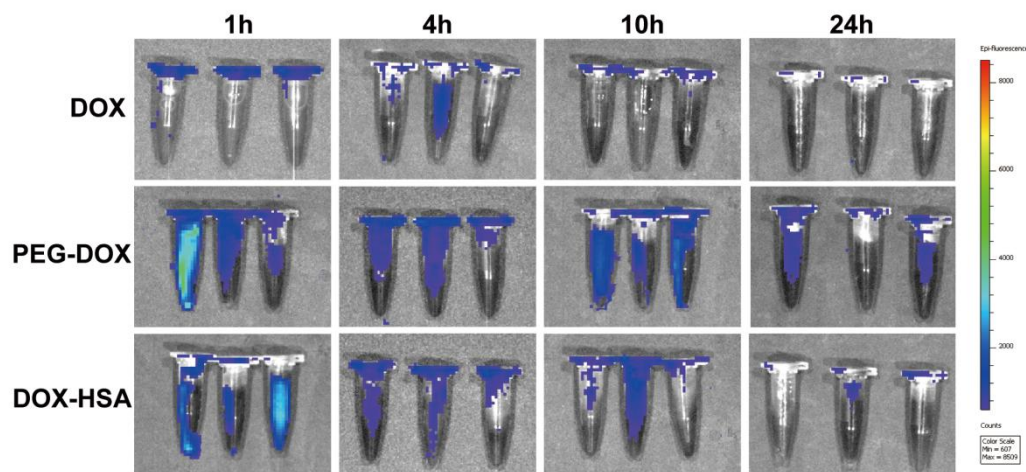

**Figure S4.** Images of fluorescence distributed in peripheral blood of DOX, PEG-DOX, and DOX-HSA. (n=3).

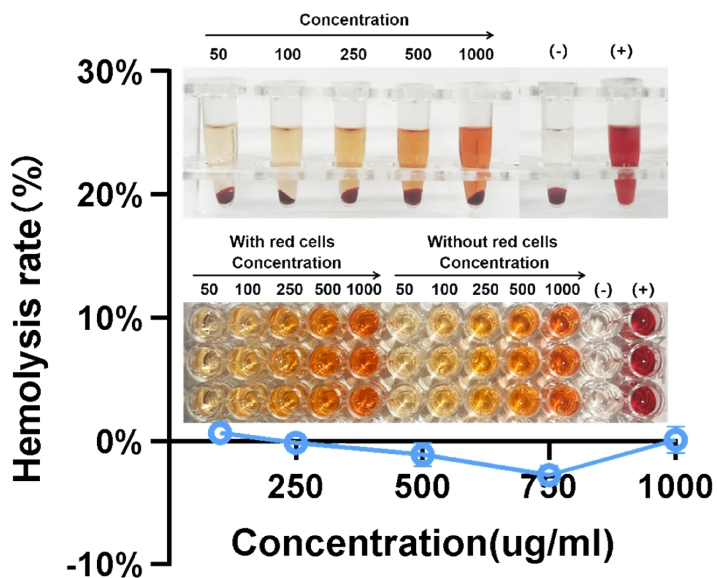

**Figure S5.** Results of the hemolysis test. Because doxorubicin itself has an orange-red appearance, which is close to the color of hemolytic red blood cells, the researchers used DOX-HSA solution without red blood cells as a control, so as to calculate the hemolysis test results.

| pH         | Binding Rate  |
|------------|---------------|
| pH 6.0-6.5 | 47.53 ± 4.85% |
| pH 7.0-7.2 | 84.69 ± 2.99% |
| pH 7.4-7.5 | 95.72 ± 1.22% |
| pH 7.8-8.0 | 88.73 ± 2.54% |
| pH 8.5-9.0 | 84.78 ± 1.32% |

**Table S1.** The binding rate change of DOX-HSA at different pH.

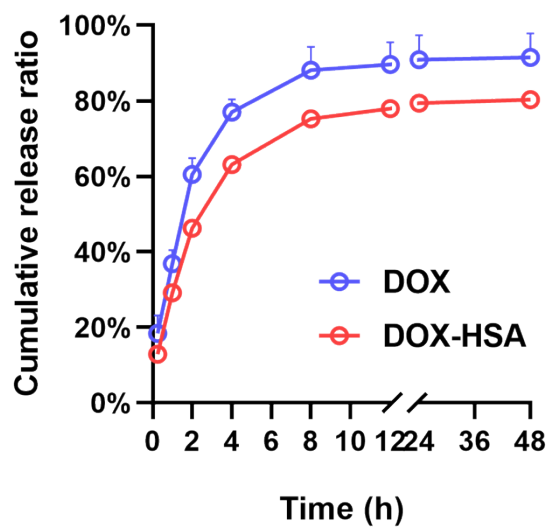

**Figure S6.** Results of the drug release studied in saline.
